# Supplementary material
Source: PubMed Central journal article supplement (PMC3351558)
Supplement: NIHMS360905-supplement-02.pdf [file NIHMS360905-supplement-02.pdf]

**Table S1.** Vertebrate, non-zebrafish sequences producing significant alignments to DICP D1-D2 domains.\*

| Query                          | Subject GenBank Accession #    | Description of subject                                                                            | Query coverage                                                                | E value | Max ident |
|--------------------------------|--------------------------------|---------------------------------------------------------------------------------------------------|-------------------------------------------------------------------------------|---------|-----------|
| <b>Dicp3b D1-D2</b>            | <a href="#">AB098477.1</a>     | <i>Cyprinus carpio</i> NITR mRNA for novel immune type receptor, complete cds                     | 99%                                                                           | 1e-52   | 48%       |
|                                | <a href="#">XM_003458344.1</a> | PREDICTED: <i>Oreochromis niloticus</i> hypothetical protein LOC100707140 (LOC100707140), mRNA    | 48%                                                                           | 4e-16   | 40%       |
|                                | <a href="#">CR727116.2</a>     | <i>Tetraodon nigroviridis</i> full-length cDNA                                                    | 73%                                                                           | 3e-10   | 38%       |
|                                | <a href="#">CR726974.2</a>     | <i>Tetraodon nigroviridis</i> full-length cDNA                                                    | 54%                                                                           | 7e-09   | 39%       |
|                                | <a href="#">BT072793.1</a>     | <i>Salmo salar</i> clone ssal-rgf-541-015 unknown large open reading frame mRNA, novel cds        | 95%                                                                           | 9e-09   | 26%       |
|                                | <a href="#">CR720133.2</a>     | <i>Tetraodon nigroviridis</i> full-length cDNA                                                    | 59%                                                                           | 4e-08   | 33%       |
|                                | <a href="#">CR732854.2</a>     | <i>Tetraodon nigroviridis</i> full-length cDNA                                                    | 92%                                                                           | 5e-08   | 29%       |
|                                | <a href="#">CR716578.2</a>     | <i>Tetraodon nigroviridis</i> full-length cDNA                                                    | 51%                                                                           | 3e-06   | 36%       |
|                                | <a href="#">NM_001124539.1</a> | <i>Oncorhynchus mykiss</i> CD4 (LOC100136285), mRNA                                               | 91%                                                                           | 5e-06   | 27%       |
|                                | <b>Dicp14a D1-D2</b>           | <a href="#">AB098477.1</a>                                                                        | <i>Cyprinus carpio</i> NITR mRNA for novel immune type receptor, complete cds | 98%     | 3e-61     |
| <a href="#">BT072793.1</a>     |                                | <i>Salmo salar</i> clone ssal-rgf-541-015 unknown large open reading frame mRNA, novel cds        | 98%                                                                           | 1e-13   | 30%       |
| <a href="#">XM_003458344.1</a> |                                | PREDICTED: <i>Oreochromis niloticus</i> hypothetical protein LOC100707140 (LOC100707140), mRNA    | 37%                                                                           | 1e-09   | 36%       |
| <a href="#">CR690772.2</a>     |                                | <i>Tetraodon nigroviridis</i> full-length cDNA                                                    | 71%                                                                           | 1e-08   | 25%       |
| <b>Dicp16a D1-D2</b>           | <a href="#">AB098477.1</a>     | <i>Cyprinus carpio</i> NITR mRNA for novel immune type receptor, complete cds                     | 95%                                                                           | 7e-55   | 54%       |
|                                | <a href="#">BT072793.1</a>     | <i>Salmo salar</i> clone ssal-rgf-541-015 unknown large open reading frame mRNA, novel cds        | 96%                                                                           | 3e-16   | 28%       |
|                                | <a href="#">XM_003458344.1</a> | PREDICTED: <i>Oreochromis niloticus</i> hypothetical protein LOC100707140 (LOC100707140), mRNA    | 55%                                                                           | 3e-14   | 41%       |
|                                | <a href="#">CR726974.2</a>     | <i>Tetraodon nigroviridis</i> full-length cDNA                                                    | 53%                                                                           | 5e-09   | 34%       |
|                                | <a href="#">CR690772.2</a>     | <i>Tetraodon nigroviridis</i> full-length cDNA                                                    | 57%                                                                           | 8e-09   | 26%       |
|                                | <a href="#">CR720133.2</a>     | <i>Tetraodon nigroviridis</i> full-length cDNA                                                    | 60%                                                                           | 1e-08   | 31%       |
|                                | <a href="#">CR727116.2</a>     | <i>Tetraodon nigroviridis</i> full-length cDNA                                                    | 59%                                                                           | 2e-07   | 33%       |
|                                | <a href="#">AJ506968.1</a>     | <i>Takifugu rubripes</i> aif1, csnk2B, cyp21A2, c4, tn timer and rxrbeta genes                    | 92%                                                                           | 2e-07   | 24%       |
|                                | <a href="#">CR716578.2</a>     | <i>Tetraodon nigroviridis</i> full-length cDNA                                                    | 39%                                                                           | 5e-07   | 35%       |
|                                | <a href="#">XM_003457735.1</a> | PREDICTED: <i>Oreochromis niloticus</i> neural cell adhesion molecule 2-like (LOC100711789), mRNA | 55%                                                                           | 5e-07   | 26%       |
|                                | <a href="#">CR732854.2</a>     | <i>Tetraodon nigroviridis</i> full-length cDNA                                                    | 92%                                                                           | 8e-07   | 29%       |
|                                | <a href="#">XM_003219306.1</a> | PREDICTED: <i>Anolis carolinensis</i> contactin 5 (cntn5), mRNA                                   | 63%                                                                           | 2e-06   | 26%       |
|                                | <a href="#">XM_001499430.1</a> | PREDICTED: <i>Equus caballus</i> contactin 5, transcript variant 3 (CNTN5), mRNA                  | 63%                                                                           | 3e-06   | 25%       |

\* Results from tBLASTn searches of the “nr” nucleotide database using DICP D1-D2 domains as queries. Alignments with E values less than 1e-06 are shown.
