# Supplementary material
Source: PubMed Central journal article supplement (PMC3351558)
Supplement: NIHMS360905-supplement-03.pdf [file NIHMS360905-supplement-03.pdf]

**Table S2.** Bacterial sources.

| Bacterial strain (isolate)              | Class               | Source                                                          | Reference                                                     |
|-----------------------------------------|---------------------|-----------------------------------------------------------------|---------------------------------------------------------------|
| <i>Edwardsiella tarda</i>               | Gammaproteobacteria | Dr. Carol Kim, University of Maine                              | Pressley et al. 2005. <i>Dev Comp Immunol.</i> 29: 501–513    |
| <i>Escherichia coli</i>                 | Gammaproteobacteria | American Tissue Culture Collection #25254, derived from K-12    | -                                                             |
| <i>Shigella flexneri</i> (00-1402)      | Gammaproteobacteria | Dr. Ed Noga, North Carolina State University                    | Noga et al. 2009. <i>Comp Biochem Physiol B.</i> 152:299-305. |
| <i>Proteus mirabilis</i> (00-1401)      | Gammaproteobacteria | Dr. Ed Noga, North Carolina State University                    | Noga et al. 2009. <i>Comp Biochem Physiol B.</i> 152:299-305. |
| <i>Klebsiella pneumonia</i>             | Gammaproteobacteria | Dr. Ed Noga, North Carolina State University                    | Silphaduang and Noga. 2001. <i>Nature.</i> 414: 268-269.      |
| <i>Aeromonas hydrophila</i>             | Gammaproteobacteria | Dr. Ed Noga, North Carolina State University                    | Silphaduang and Noga. 2001. <i>Nature.</i> 414: 268-269.      |
| <i>Aeromonas salmonicida</i>            | Gammaproteobacteria | Dr. Ed Noga, North Carolina State University                    | Silphaduang and Noga. 2001. <i>Nature.</i> 414: 268-269.      |
| <i>Vibrio alginolyticus</i>             | Gammaproteobacteria | Dr. Ed Noga, North Carolina State University                    | Silphaduang and Noga. 2001. <i>Nature.</i> 414: 268-269.      |
| <i>Aeromonas</i> sp. ZWU0008            | Gammaproteobacteria | Dr. John Rawls, University of North Carolina – Chapel Hill      | Rawls et al., 2006. <i>Cell.</i> 127:423-33                   |
| <i>Pseudomonas</i> sp. ZWU0006          | Gammaproteobacteria | Dr. John Rawls, University of North Carolina – Chapel Hill      | Rawls et al., 2006. <i>Cell.</i> 127:423-33                   |
| <i>Pseudomonas</i> sp. ZOR0024          | Gammaproteobacteria | Erika Mittge and Dr. Karen Guillemin, University of Oregon      | Unpublished                                                   |
| <i>Streptococcus iniae</i>              | Bacilli             | American Tissue Culture Collection #29178                       | -                                                             |
| <i>Lactococcus garveae</i> (00-1426)    | Bacilli             | Dr. Ed Noga, North Carolina State University                    | Noga et al. 2009. <i>Comp Biochem Physiol B.</i> 152:299-305. |
| <i>Streptococcus faecalis</i> (00-1403) | Bacilli             | Dr. Ed Noga, North Carolina State University                    | Noga et al. 2009. <i>Comp Biochem Physiol B.</i> 152:299-305. |
| <i>Exiguobacterium</i> sp. ZWU0009      | Bacilli             | Dr. John Rawls, University of North Carolina – Chapel Hill      | Rawls et al., 2006. <i>Cell.</i> 127:423-33                   |
| <i>Mycobacterium tuberculosis</i>       | Actinobacteria      | BD Difco Labs, #231141, avirulent strain H37 RA                 | -                                                             |
| <i>Mycobacterium marinum</i>            | Actinobacteria      | American Tissue Culture Collection #BAA-535, wild type strain M | -                                                             |
| <i>Mycobacterium butyricum</i>          | Actinobacteria      | BD Difco Labs, #264010                                          | -                                                             |
| <i>Cellulomonas</i> sp. ZWU0001         | Actinobacteria      | Dr. John Rawls, University of North Carolina – Chapel Hill      | Rawls et al., 2006. <i>Cell.</i> 127:423-33                   |
| <i>Chryseobacterium</i> sp. ZOR0023     | Flavobacteria       | Erika Mittge and Dr. Karen Guillemin, University of Oregon      | Unpublished                                                   |
