# Supplementary material
Source: PubMed Central journal article supplement (PMC3351558)
Supplement: NIHMS360905-supplement-04.pdf [file NIHMS360905-supplement-04.pdf]

>D1cp3a<sup>2326</sup> (GenBank JN416849)

MADRSPFLLLLI FWTLS TGVFGAEHTPVSSSSGETVHLP CRNTDQY CSTSGT TWIY SRDTQTAAVELITLGVKKTNSERLNLGSDCSLTI SRVTTEDAGY  
YTCQQWSGPGGHQY GADSHVFLQVVAEAKTPTTTTTTTTTTATSATTRTGAAA AVTPEHNTNTI KAAKTTTTVTPLHNTNPKIENPKAASPAPDFKT  
KAEPKPQAEKTDETPKAEAQTAAAAAATPDHNTNTTTQAAGSSSAVLSVLLSAAALAVFIAAVLCLIQRRRRAAHQRASGESAEQTEDSVTYSEVTCAG  
KKPEKSASDDGDNDSTVYAAVSRRA

>D1cp3a<sup>2614</sup> (GenBank JN416850)

MADRSPFLLLLI FWTLS TGVFGAGETRVSRSGETVHLP CRNTDQH CRTSGT TWIYSSPRLTAAVELIELGVKKTNSERLNLGSDCSLIISRVTTEDAGS  
YICQQWSGKGGHHYGPDSVFLHVVAEAKTTTTTTTTTATSATTTGAAA AVTPDHNTNTI KAAKTTTTVTPLHNTNPKTENPKAAA PAAKTS AVTP  
TKTTTTIQAGASITVLSVLLSAAALAVFIAAVLCLIQRRRRAAHQRASGESAVKDENVHYQTIHMSINPAARAHEQTEDSVTYSEVTCAGKKPEKSA  
SDDGDNDSTVYAAVSRRA

>D1cp3g<sup>2323</sup> (GenBank JN416851)

MADRSPFLLLLI FWTLS TGVFGAEWRQVSCSSGQTVHLP CINTVQHCRPSETTWLYSKDNQAVELISFGVKKRNSERLNLGSDCSLNI SRVTTEDAGYYT  
CQQWSGEGGHQYGTARVLLHVAVSPSSSSSSSSSDICPAEAKTTTAAAVTPVHNKNPKTEKPRAASPAEQIPAAVTLVYNTTSPQSSSAVSVIVAVV  
AVFALLFSALIVWL IHNRLADDEEDCDSSLLTSVVFSETPAEHMKRMKYSV

>D1cp3i<sup>2114</sup> (GenBank JN416852)

MADRSPFLLLLI FWTLS TDVFGAEETHEFSSGETVHLP CNDTQHCSTSGT TWLYSRDNQAVELISLGVKKTDTGKHERLNLGSDCSLTI SRVTTGDAGS  
YTCQQWRGDQKQGNDSRVFLDVVADSLSSVLSVLLSAAALAVFIAAVLCLIQRRRRAAHQRASGESAVKDENVHYQTIHMSINPAARAHEQTEDSVTY  
SEVTCAGKKPEKSASDDGDNDSTVYAAVSRRA

>D1cp3q-tv1<sup>2145</sup> (GenBank JN416853)

MADRSPFLLLLI FWTLS TGVFGAGETPVLSMFGETVHLP CINTVQDCRPAGTTWLYRRALNSRMVQLIGVGRNSEKHERLNLGSDCSLIISRVTTEDAGF  
YICRQWTEWDKHHGDARLFLHVLNANTAPAVTQGLFTPTNTPTRTSKSAKGNRVTA VSPDHNTNSEDPQSPNPAGSSTA VSVIVAVVAVFALLFSAPIVW  
L IHNRLADGKDEDCDSSLLTSVVFSETPAEHMKRMKYSV

>D1cp3q-tv2<sup>1910</sup> (GenBank JN416854)

TAAVQLIGVGRNSEKHERLNLGSDCSLIISRVTTEDAGFYICRQWTEWDKHHGDARLFLHVLNNGNFNIMVSLSSSKFSPFPQSIIMCCRMIDFVIRLDQS  
LDLFL

>D1cp3cd<sup>2748</sup> (GenBank JN416855)

MADRSPFLLLLI FWTLS TGVFGVEDIDVFSRSGETVHLP CINTVQHCRPSETTWTYGRYRQTADELICFGRKKAKPEKHERLNLGSDCSLIISRVTTED  
AGLYICQQWSGNQKQGNDSVFLHVAVSVSSSSSDIGPGLSLTSLCQLYSDSGFSCDGLFSSSEDLHLSWVNEAGVDLNTDSRYQIISSTGCIISLSTTLI  
SEDEKQWRGCVYQRNLKTSDFTFVHYSAPDLTAKAEPTPTETAADTTEAGAQTAAAEPTPDHSTNCTSI TAKAEAEFTFCVIKQQ

>D1cp3ef<sup>1512</sup> (GenBank JN416856)

RNSERLNLGSDCSLIISRVTTEDAGRYTCQQWSGRGHQYGPDSAVYLHVAVSPSSSSSSSSSSSSSDIGPGLSLTSLCQLYSDSGFSCDGLFSSSEDLHLSWVNEAGVDLNTDSRYQIISSTGCIISLSTTLI  
DLHLSWVDEAGVDLNTDSRYQIISSTGCIISPTSTLISEDEKQWRGCVYQRNLKTSDFTFVHYSVGFGEEDTHVFSRSGETVQLPCRNTVQYCRRTGT  
WTYSRYRQTA AVQLIG

>D1cp14a<sup>1938</sup> (GenBank JN416857)

MTRHMDMLGLIIFCSILKEASQKIIHVFSDDAENATLPCYNASADCTSTTWAYYSKRGSPIELFNGKIHDRLSLSDCSLNIYKTTTKDLGVYTCWL  
GVKDTQRTKFGNVYHVLQVSPSSSQTIKPGRSVTLFCQLYFCYEHSCETLLSSEGLQLIWNESGVNLQTDTSRFQIISLSDHCSISLTKTLLEDDNTE  
WRCQITKGEVKT SVSYTVSYLGGIEIVGRGLLVRGIIIIIMAALESFPTALLWICKTRAGKRHPENVEI

>D1cp14b-tv1<sup>2271</sup> (GenBank JN416858)

MLGLIIFCSILKETSQKIIHVFSDDAENATMPCYDAPADCTSTTWGYYSKRGSQGIELFNGKIHDRDKHDRLRRLGSDCSLNIYTTTTKDLGVYTCWLG  
VKDTQKTHGNVYFHVQLVSPSSSQTHIRPGRSFTLSCQLHFYEHSCETLLTSEGLRLIWNESDVNLQTDTSRFQIISLSDHCSISLTKTLLEDDNTE  
RCQITKGEVKT SVSYTVSYLASTPTPVNTTQVIFAVLAAVAALLVLIIVIGLILKNRAGRKADHAELISNFTPVTAAADINGKMMCGQMTDDVAYAEV  
ITSSNLCKVRRNVQSDDKVTVYVAIRGGKV

>D1cp14b-tv2<sup>2011</sup> (GenBank JN416859)

MLGLIIFCSILKVSSPSSQTIKPGSSVTLSCQLHFYEHSCETLLTSEGLRLIWNESGVNLQTDTSRFQIISLSDHCSISLTKTLLEDDNTEWRCQIT  
KGEVKT SVSYTVSYLASTPTPVNTTQVIFAVLAAVAALLVLIIVIGLILKNRAGRKADHAELISNFTPVTAAADINGKMMCGQMTDDVAYAEVITSSN  
LCKVRRNVQSDDKVTVYVAIRGGKV

>D1cp14b-tv3<sup>2247</sup> (GenBank JN416860)

MLGLIIFCSILKVSSPSSQTIKPGSSVTLSCQLHFYEHSCETLLTSEGLRLIWNESGVNLQTDTSRFQIISLSDHCSISLTKTLLEDDNTEWRCQIT  
KGEVKT SVSYTVSYLGRKADHAELISNFTPVTAAADINGKMMCGQMTDDVAYAEVITSSNLCKVRRNVQSDDKVTVYVAIRGGKV

>D1cp16a-tv1<sup>2065</sup> (GenBank JN416861)

MTDKGHVCLQLGLMIYCSLLKGTIGAEIVFFTSGENVNLPCKNALSGCTSTTWNYNRHKSVELVAGGSLKTDIKRERLRSVSDCSLNI MNATKEDY G  
SYICQQYVNGEQGNYVLFYTLVNLVSSLSQTEMRAGRSVTLKCKLEYSVGVSCDTLFRTEGYLVVWNAERNLVTDNRYKIFSSSPCMISLTTLLNED  
HNKEWRQQLTQNNLKTSAFVTKYTSDSAVKPDNKTEVIAAVA AVLAALAVFVAVFLVVEK KRAGNLRAANTDAGDLNQHKGYSYKTIINIAVKDDEG  
AYETIPMSIPSAHNANQKDDVTVYSEVISPNGKNQVKLDTDRSNETVYTYMIRETERAPDGLYATVKK

>D1cp16a-tv2<sup>1912</sup> (GenBank JN416862)

CNSALSGCTSTWNYNRGNTIELVGVGLNNIDRRERL SVSDCSLNI MNATKEDYGSYSYCRQYVNEQQQENDARVYTLVNLVSSLSQTEMRAGRSVT  
LCKLEYGVSCDTLFRTEGYQLVWVNAERNLATDSRYKIFSSSPCMISLTTLLNEDHNKEWRQQLTQNNLKTSAFVTKYASASNATTVKPAQSDS  
SAVKPDNKTEDSDSAVKPDNKTEVIAAVA AVLAALAVFVAVFLVVEK KRAGNLRAANTDARDLNQHKGSYKTIINIAVKDDEGAYETIPMSIPSAHNAN  
CSARCLFYTIINLHCFH

>D1cp16c<sup>2081</sup> (GenBank JN416863)

MAKECHVYLLGLIILCPLPTGTNGAEIVFFRSGENVNLPCNNALSDCTSTTWYNRDLNTIELVGLGKLNNIERRERL SVSDCSLNI MNATKEDYGS  
YSCQYVYKGEQQGIDALVYTLVHVSSLSQAEMRAGRSVTLKCELEYSVGVSCDTLFRTEGYQLVWVNAERNLVTDNRYKIFSSSPCMISLTTLLNED  
HNREWRQQLTQNNLKTSAFVTKYSESSSHAQTASAPTOQGIIMFLSSY
