# Supplementary material
Source: PubMed Central journal article supplement (PMC3351558)
Supplement: NIHMS360905-supplement-06.pdf [file NIHMS360905-supplement-06.pdf]

|                         | leader | D1                                                             |
|-------------------------|--------|----------------------------------------------------------------|
| Di cp3g <sup>2323</sup> | 1      | MADRSPFLLLIFWTLSTGVFGAEWRQVSCSSGQTVHLPCINTVQHCRPSETTWLYSKDN    |
| Di cp3g <sup>262</sup>  | 1      | MADRSPFLLLIFWTLSTGVFGAEWRQVSCSSGQTVHLPCINTVQHCRPSETTWLYSKDN    |
| Di cp3h <sup>262</sup>  | 1      | MADRSPFLLLIFWTLSTGVFGAEWRPLSCSSGQTVHLPCINTVQHCRPSETTWLYSKDN    |
|                         |        | D1                                                             |
| Di cp3g <sup>2323</sup> | 61     | QAVELISFGVKKRNSERLNLGSDCSLNI SRVTTEDAGYYTCQQWSGEGGHQYGT YARVLL |
| Di cp3g <sup>262</sup>  | 61     | QAVELISFGVKKRNSERLNLGSDCSLNI SRVTTEDAGYYTCQQWSGEGGHQYGT YARVLL |
| Di cp3h <sup>262</sup>  | 61     | QAVELINFGVKKRNSERLNLGSDCSLNI SRVTTEDAGYYTCQQWSGEGGHQYGT YARVLL |
|                         |        | LC                                                             |
| Di cp3g <sup>2323</sup> | 121    | HVVAVSPSSSSSSSDICPAEAKTTTAAAVTPVHNKNPKTEKPRAASPAEAQIPAAVTL     |
| Di cp3g <sup>262</sup>  | 121    | HVVAVSPSSSSSSSDICPAEAKTTTAAAVTPVHNKNPKTEKPRAASPAEAQIPAAVTL     |
| Di cp3h <sup>262</sup>  | 121    | HVVAVSPSSSSSSSDICPAEAKTTTAAAVTPVHNKNPKTEKPRAASPAEAQIPAAVTL     |
|                         |        | TM                                                             |
| Di cp3g <sup>2323</sup> | 181    | VYNTTSPQSSSAVSVIVAVVAVFALLFSALIVWLIHNRLADDEEEDCDSSLLTSVVFSET   |
| Di cp3g <sup>262</sup>  | 181    | VYNTTSPQSSSAVSVIVAVVAVFALLFSALIVWLIHNRLADDEEEDCDSSLLTSVVFSET   |
| Di cp3h <sup>262</sup>  | 181    | VYNTTSPQSSSAVSVIVAVVAVFALLFSALIVWLIHNRLADDEEEDCDSSLLTSVVFSET   |
| Di cp3g <sup>2323</sup> | 241    | PAEHMWRMKYSV                                                   |
| Di cp3g <sup>262</sup>  | 241    | PAEHMWRMKYSV                                                   |
| Di cp3h <sup>262</sup>  | 241    | PAEHMWRMKYSV                                                   |
