# Supplementary material
Source: PubMed Central journal article supplement (PMC3351558)
Supplement: NIHMS360905-supplement-07.pdf [file NIHMS360905-supplement-07.pdf]

|                              |     |                                |                                                |
|------------------------------|-----|--------------------------------|------------------------------------------------|
|                              |     | <u>leader</u>                  | <u>D1</u>                                      |
| Dicp14b <sup>2271</sup> -tv1 | 1   | MLGLIIFCSILKETS                | SGQKIIHFVSSDAENATMPCYDAPADCTSTTWGYYSKRGSGQIELF |
| Dicp14b <sup>2011</sup> -tv2 | 1   | MLGLIIFCSILKVSS                | -----                                          |
| Dicp14b <sup>2247</sup> -tv3 | 1   | MLGLIIFCSILKVSS                | -----                                          |
|                              |     |                                | <u>D1</u>                                      |
| Dicp14b <sup>2271</sup> -tv1 | 61  | SNGKIHDRDKHDRRLRSGSDCSLNIYTTT  | KDLGVYTCWLGVKDTQKTHGNVYFHVLRVSP                |
| Dicp14b <sup>2011</sup> -tv2 | 16  | -----                          | -----                                          |
| Dicp14b <sup>2247</sup> -tv3 | 16  | -----                          | -----                                          |
|                              |     |                                | <u>D2</u>                                      |
| Dicp14b <sup>2271</sup> -tv1 | 121 | SSSQTHIRPGRSFTLSCQLHFYYEHS     | CETLLTSEGLRLIIVNESDGNLQDTSRFQISSSL             |
| Dicp14b <sup>2011</sup> -tv2 | 16  | PSSQTHIRPGRSFTLSCQLHFYYEHS     | CETLLTSEGLRLIIVNESDGNLQDTSRFQISSSL             |
| Dicp14b <sup>2247</sup> -tv3 | 16  | PSSQTHIRPGRSFTLSCQLHFYYEHS     | CETLLTSEGLRLIIVNESDGNLQDTSRFQISSSL             |
|                              |     | <u>D2</u>                      | <u>TM</u>                                      |
| Dicp14b <sup>2271</sup> -tv1 | 181 | NYCNISMTTKLLNEDDSTEWRCQITKG    | SEVKTSVSYTVSYLASTPTPVNTTQVIFAVLAA              |
| Dicp14b <sup>2011</sup> -tv2 | 76  | NYCNISMTTKLLNEDDSTEWRCQITKG    | SEVKTSVSYTVSYLASTPTPVNTTQVIFAVLAA              |
| Dicp14b <sup>2247</sup> -tv3 | 76  | NYCNISMTTKLLNEDDSTEWRCQITKG    | SEVKTSVSYTVSYL-----                            |
|                              |     | <u>TM</u>                      | <u>ITIM</u>                                    |
| Dicp14b <sup>2271</sup> -tv1 | 241 | VAALLVLIVIIIGLILKNRGRKADHAELIS | NFTPVTPAAADINGKMMCGQMTDDVAYAEV                 |
| Dicp14b <sup>2011</sup> -tv2 | 136 | VAALLVLIVIVGLILKNRGRKADHAELIS  | NFTPVTPAAADINGKMMCGQMTDDVAYAEV                 |
| Dicp14b <sup>2247</sup> -tv3 | 118 | -----                          | -----RKADHAELISNFTPVTPAAADINGKMMCGQMTDDVAYAEV  |
|                              |     |                                | <u>ITIM</u>                                    |
| Dicp14b <sup>2271</sup> -tv1 | 301 | ITSSNLCKVRRNVQSDDKVTYVAIRGGKV  |                                                |
| Dicp14b <sup>2011</sup> -tv2 | 196 | ITSSNLCKVRRNVQSDDKVTYVAIRGGKV  |                                                |
| Dicp14b <sup>2247</sup> -tv3 | 158 | ITSSNLCKVRRNVQSDDKVTYVAIRGGKV  |                                                |
