# Supplementary material
Source: PubMed Central journal article supplement (PMC3351558)

## A. *dicp16a* alleles

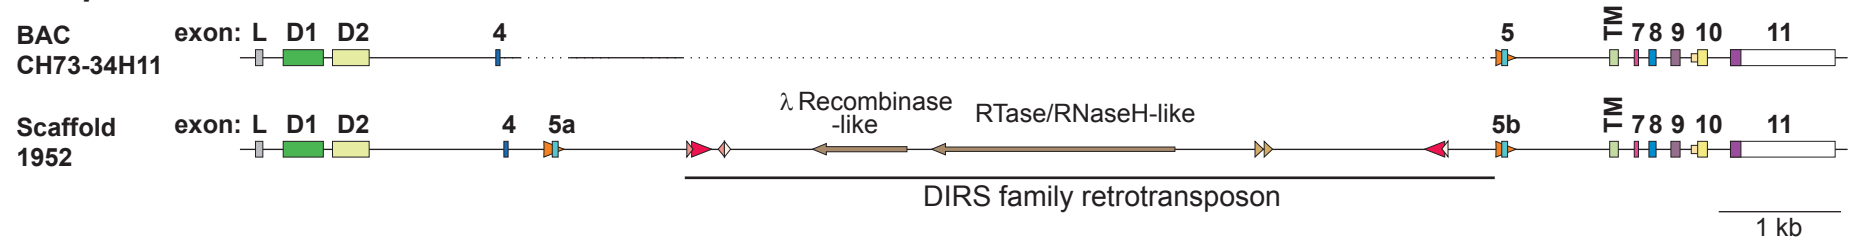

## B. *dicp16a*<sup>1952</sup> retrotransposon associated repeats

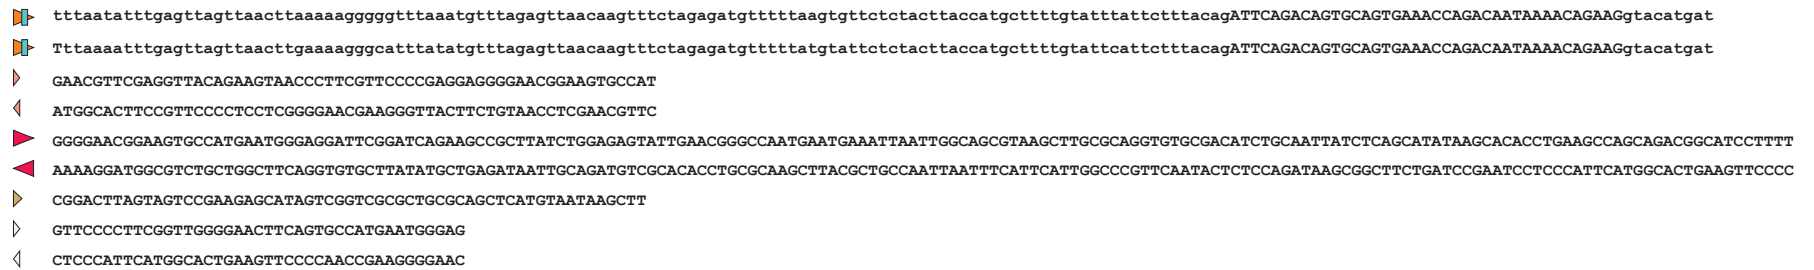

## C. *dicp16a* transcript variants

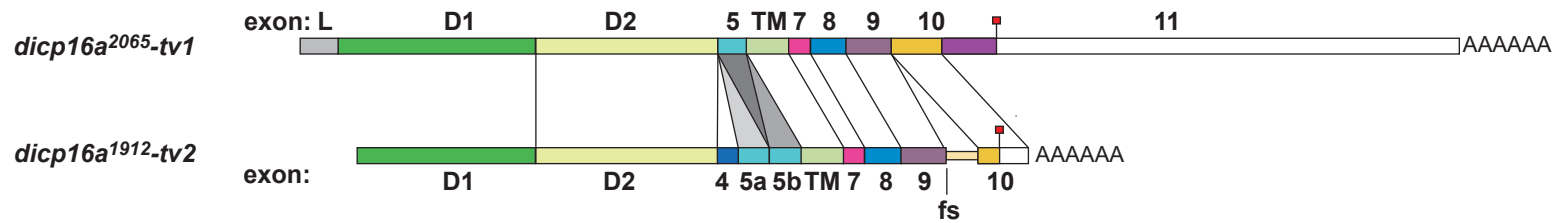

Supplement: NIHMS360905-supplement-08.pdf [file NIHMS360905-supplement-08.pdf]
