# Supplementary material
Source: PubMed Central journal article supplement (PMC3351558)
Supplement: NIHMS360905-supplement-12.pdf [file NIHMS360905-supplement-12.pdf]

**A**

>Dicp3e<sup>529</sup>-D1 (GenBank JN416884) and Dicp3e<sup>262</sup>-D1  
 3e<sup>529</sup> VFGEEDTHVFSRSGETVQLPCRNTVOYCRRTGTTWTYSSRYRQTAAVQLIGLVKKRNSERLNLGSDCSLIIISRVTTEDAGRYTCQOWSGRGGHOYGPDSVVYLHVVA  
 3e<sup>262</sup> VFGEEDTHVFSRSGETVQLPCRNTVOYCRRTGTTWTYSSRYRQTAAVQLIGLVKKRNSERLNLGSDCSLIIISRVTTEDAGRYTCQOWSGRGGHOYGPDSVVYLHVVA

>Dicp3f<sup>533</sup>-D1 (GenBank JN416879) and Dicp3f<sup>262</sup>-D1  
 3f<sup>533</sup> VFGEEDTHVFSRSGETVHLPCRNTDQYCRRTSGTTWTYSSYRQTAAVQLIGLVKKRNSERLNLGSDCSLIIISRVTTEDAGRYTCQOWSGRGGHOYGADSHVYLHVVA  
 3f<sup>262</sup> VFGEEDTHVFSRSGETVHLPCRNTDQYCRRTSGTTWTYSSYRQTAAVQLIGLVKKRNSERLNLGSDCSLIIISRVTTEDAGRYTCQOWSGRGGHOYGEDSAVYLHVVA

>Dicp3n<sup>505</sup>-D1 (GenBank JN416880) and Dicp3n<sup>262</sup>-D1  
 3n<sup>505</sup> VFC--ETHVFSSGETVYLPCRNTDQHCRTTETDLYNRNTQSWTDTLIKSGVNERNSERLNLGSDCSLIIISRVTTGDAGSYTCRQWRGDHTYGADSAVYLHVVA  
 3n<sup>262</sup> VFCAKDQDVFSRYGETVHLPCRNTDQHCRTTETDLYNRNTQSWTDTLIKSGVNERNSERLNLGSDCSLIIISRVTTGDAGVSYTCRQWRGDHTYGADSRVFLHVVA

>Dicp3p<sup>179</sup>-D1 (GenBank JN416882) and Dicp3p<sup>262</sup>-D1  
 3p<sup>179</sup> VFGAGDTHVFSRSGETVHLPCRNTDQYCRRTSGTTWTYNSHRLTAAVSMFTLVKQRNSERLNLGSDCSLIIISRVTTEDAGLYICQQWRGDQKQGNPAHVYLHVVA  
 3p<sup>262</sup> VFGAGDTHVFSRSGETVHLPCRNTDQYCRRTSGTTWTYNSHRLTAAVSMFTLVKQRNSERLNLGSDCSLIIISRVTTEDAGLYICQQWRGDQKQGNPAHVYLHVVA

>Dicp3s<sup>507</sup>-D1 (GenBank JN416881) and Dicp3s<sup>262</sup>-D1  
 3s<sup>507</sup> VFGETHVFSRSGETVYLPCRNTDQHCRTSGLTWTYSRDRQTATVAMFTLGEKKRNSERLNLGSDCSLIIISRVTTEDAGIYICQOWSGRGGHOYGADSRVYLHVVA  
 3s<sup>262</sup> VFGETHVFSRSGETVYLPCRNTDQHCRTSGLTWTYSRDRQTATVAMFTLGEKKRNSERLNLGSDCSLIIISRVTTEDAGIYICQOWSGRGGHOYGADSRVFLHVVA

>Dicp14a<sup>197</sup>-D2 (GenBank JN416883) and Dicp14a<sup>1719</sup>-D2  
 14a<sup>197</sup> SPSSSQTIKPGRSVTLFCQLYFCYEHSCETLLSSEGLQLIWNESGVNLTQDSRFQILSSVDHCSISLTKTLLDEDDNTEWRCQITKGSEVKT SVSYTVSYL  
 14a<sup>1719</sup> SPSSSQTIKPGRSVTLFCQLYFCYEHSCETLLSSEGLQLIWNESGVNLTQDSRFQILSSVDHCSISLTKTLLDEDDNTEWRCQITKGSEVKT SVSYTVSYL

>Dicp16a<sup>189</sup>-D1 (GenBank JN416885) and Dicp16a<sup>1952</sup>-D1  
 16a<sup>189</sup> GTSGAEDILFFRSGENVSLPCNNALSGCTSTTWNYNRGSNTIELVGVGKLNIDRRERLSVGSDCSLNIMNATKEDYGSYSCROYVNEQQQENDARVYLTVLN  
 16a<sup>1952</sup> GTSGAEDILFFRSGENVSLPCNNALSGCTSTTWNYNRGSNTIELVGVGKLNIDRRERLSVGSDCSLNIMNATKEDYGSYSCROYVNEQQQENDARVYLTVLN

**B**

3e<sup>529</sup> VFGEEDTHVFSRSGETVQLPCRNTVOYCRRTGTTWTYSSRYRQTAAVQLIGLVKKRNSERLNLGSDCSLIIISRVTTEDAGRYTCQOWSGRGGHOYGPDSVVYLHVVA  
 3f<sup>533</sup> VFGEEDTHVFSRSGETVHLPCRNTDQYCRRTSGTTWTYSSYRQTAAVQLIGLVKKRNSERLNLGSDCSLIIISRVTTEDAGRYTCQOWSGRGGHOYGADSHVYLHVVA  
 3n<sup>505</sup> VFC--ETHVFSSGETVYLPCRNTDQHCRTTETDLYNRNTQSWTDTLIKSGVNERNSERLNLGSDCSLIIISRVTTGDAGSYTCRQWRGDHTYGADSAVYLHVVA  
 3p<sup>179</sup> VFGAGDTHVFSRSGETVHLPCRNTDQYCRRTSGTTWTYNSHRLTAAVSMFTLVKQRNSERLNLGSDCSLIIISRVTTEDAGLYICQQWRGDQKQGNPAHVYLHVVA  
 3s<sup>507</sup> VFC--ETHVFSSGETVYLPCRNTDQHCRTSGLTWTYSRDRQTATVAMFTLGEKKRNSERLNLGSDCSLIIISRVTTEDAGIYICQOWSGRGGHOYGADSRVYLHVVA  
 16a<sup>189</sup> GTSGAEDILFFRSGENVSLPCNNALSGCTSTTWNYNRGSNTIELVGVGKLNIDRRERLSVGSDCSLNIMNATKEDYGSYSCROYVNEQQQENDARVYLTVLN
