# Supplementary material
Source: PubMed Central journal article supplement (PMC3351558)
Supplement: NIHMS360905-supplement-13.pdf [file NIHMS360905-supplement-13.pdf]

>Dicp3a<sup>262</sup>  
VFGAEHTPVSSSSGETVHLPSCRNTDQYCSSTGTTWYISRDQTAAVELITLGVKKTNSERLNLGSDCSLTIISRVTTEDAGYYTCQQWSGPGGHQYGADSHVFLQVVA

>Dicp3b<sup>262</sup>  
VFGEDTHVFSRSGETVHLPSCRNTDQYCRTSGTTWLYSKYQSWDTLNLINLVKRTTPERLNLGSDCSLIIISRVTTEDAERYTCQQWSGEGGHQYGADSVVYLHVVA

>Dicp3c<sup>262</sup>  
VFGEDTHVFSRSGETVQLPCRNTDQHCSSRSGTTWYISRYRQTAAVQLIGLVKKNRNSERLNLGSDCSLTIISRVTTEDAGRYTCQQWSGRGGHQYGADSHVFLHVVA

>Dicp3d<sup>262</sup>  
VFGAGETHVFSRSGETVHLPSCRNTDQYCRTSGTTWYISRYRQTAAVQLIGLVKKNRNSERLNLGSDCSLIIISRVTTEDAGRYTCQQWSGRGGHQYGPDSVVYLVNVA

>Dicp3e<sup>262</sup>  
VFGEDTHVFSRSGETVQLPCRNTVQYCRRTGTTWYISRYRQTAAVQLIGLVKKNRNSERLNLGSDCSLIIISRVTTEDAGRYTCQQWSGRGGHQYGPDSVVYLVHVVA

>Dicp3f<sup>262</sup>  
VFGEDTHVFSRSGETVHLPSCRNTDQYCRTSGTTWYISRYRQTAAVQLIGLVKKNRNSERLNLGSDCSLIIISRVTTEDAGRYTCQQWSGRGGHQYGPDSAVYLVHVVA

>Dicp3g<sup>262</sup>  
VFGAEWRQVSCSSGQTVHLPICINTVQHCPSSETTWLYSKDNQAVELISFGVKKRNSERLNLGSDCSLNIISRVTTEDAGYYTCQQWSGEGGHQYGYARVLLHVVA

>Dicp3h<sup>262</sup>  
VFGAEWRPLSCSSGQTVHLPICINTVQHCPSSETTWLYSKDNQAVELINFLGKKNRNSERLNLGSDCSLNIISRVTTEDAGYYTCQQWSGEGGHQYGYARVLLHVVA

>Dicp3i<sup>262</sup>  
VFGAEWRQVSCSSGQTVHLPICNNTVQHCSTSETTWLYSKGQTDTLFNLGVNGRNSERLNLGSDCSLIIISRVTTEDAGYYTCQQWRGNGKQSNDSAVFLHVVA

>Dicp3k<sup>262</sup>  
VFIAGETHVFSRSGETVHLPSCRNTDQHCNTSETTWLNSYRQTAAMFTLGVKQTNSEERLNLGSDCSLIIISRVTTEDAGLYTCQQWSGNQQGPD SRVFLHVVA

>Dicp3l<sup>262</sup>  
VFGAGETHVFSRSGETVHLPSCRNTDQHCSTSGTTWLYNSGRQTVVLIILGVKQTNSEERLNLGSDCSLTIISRVTTEDAGLYICTQRRGDQKQGPDSVVFLHVVA

>Dicp3n<sup>262</sup>  
VFGAKDTHVFSRYGETVHLPSCRNTDQHCRTTETDNLNRNTQTWDTLILKSGVNERNSERLNLGSDCSLIIISRVTTEDAVSYICRQWRGDHTYGADSRVFLHVVA

>Dicp3o<sup>262</sup>  
VFGAEKDTDFVFSRSGEIVHLPSCRNTDQHCRTSGTTWLYTRDRQTAABELIGLVKKNRNSERLNLGSDCSLIIISRVTAEDAGYYTCQQWRGDQKQGNDSAVFLHVVA

>Dicp3p<sup>262</sup>  
VFGADTHVFSSSGQTVHLPSCRNTDQYCRTSGTTWYINSHRLTAAMFTLGVKQRNSERLNLGSDCSLIIISRVTTEDAGLYTCQQWRGDQKQGNPAHVYLHVVA

>Dicp3q<sup>262</sup>  
VFGAGETPVLMSFGETVHLPICENTVQDCRPAGTTWLYRRALNSRMVQLIGVGRNSEKHERLNLGSDCSLIIISRVTTEDAGFYICRQWTEWVKHGH DARLFLHLVN

>Dicp3r<sup>262</sup>  
VFGAGETHVFSSSGQTVHLPSCRNTDQHCNTSGTTWYISRDRTVELIRFGRKKNPEKHERLNLGSDCSLIIISRVTTEDAGYYICRRQWRGQQQRDARVFLHVVA

>Dicp3s<sup>262</sup>  
VFGETHVFSSSGQTVYLPSCRNTDQHCRTSGTTWYISRDRTATVAMFTLGEKKRNSERLNLGSDCSLIIISRVTTEDAGYYTCQQWSGRGGHQYGADSRVFLHVVA

>Dicp3t<sup>262</sup>  
VIGAKDIHVFSSSGQTVARLRCINVDLQCKRLTWYQTGTTFTLTKLGVNVESTKHERLNLSSDCSLIIISRVTTEDAGYYMCLDEAPKYVDVPHVYLHVLD

>Dicp3u<sup>262</sup>  
LIGAGETHVFSSSGQTVHLPSCRNTVQCRPAGTTWYTRFRQYTSQTTKIIIVLGVKEMATKVSMLYLGSDCSLTL SRVIVEMAGRYTCQQWSEDDQYGPDAHVYLHVVA

>Dicp14a<sup>1719</sup>  
ASGQKIHFVSSDAENATLPCYNASADCTSTTWAYYSKRGSPGIELFSNGKIHDRLSLGSDCSLNIYKTTTKDLGVYTCWLGVKDTQKTFGNVYLHVLD

>Dicp14b<sup>1719</sup>  
TSGQKIRVFSSSDAENATMPCYDAPADCTSTTWAYYSKRGSPGIELFSNGKIHDRKHDRLSLGSDCSLNIYTTTTTKDIGVYTCWLGVKDTQKTFGNVYFHVLD

>Dicp16a<sup>1952</sup>  
TSGAEDILFFRSGENVSLPCNNALSGCTSTTWYNNRGSNTIELVGVGKLNINDRERLSVGSDCSLNIMNATKEDYGSYICQQYVNEQQQENDARVYLVTLN

>Dicp16a<sup>34H11</sup>  
TIGAEDIVFFTSGENVSLPCNNALSGCTSTTWYNNRHSKTVELVAGGSLKTDIKRRERLSVGSDCSLNIMNATKEDYGSYICQQYVNEQQQGNVYLVYLVTLN

>Dicp16b<sup>1952</sup>  
GAEDTHVFFRSGENVHLPICNNALSGCTSTTWYNNRHSKTVELVAGGSLKTDIKRRERLSVGSDCSLNIMNATKEDYGSYICQQYVNEQQQGNVYLVYLVTLN

>Dicp16b<sup>34H11</sup>  
AAEDTHVFFRSGENVRLPCNNALSGCTSTTWYNNRHSKTVELVAGGSLKTDIKRRERLSVGSDCSLNIMNATKEDYGSYICQQYVNEQQQGNVYLVYLVTLN

>Dicp16c<sup>1952</sup>  
TSGAETHVFFRSGENVRLPCNNALSDCTSTTWYNNRHSKTVELVAGGSLKTDIKRRERLSVGSDCSLNIMNATKEDYGSYICQQYVNEQQQGNVYLVYLVTLN

>Dicp16c<sup>322B17</sup>  
TNGAEDIVFFRSGENVSLPCNNALSDCTSTTWYNNRDLNTELVGLGKLNINERRERLSVGSDCSLNIMNATKEDYGSYICQQYVNEQQQGNVYLVYLVTLN

>Dicp16d<sup>1952</sup>  
ICGVEDTHVFLSSEKNVRLPCNNALSGCTSTTWLYTRHSETVELVAGGKLNINERRERLSVGSDCSLNIMNATKEDYGSYICQQYVNEQQQGNVYLVYLVTLN

>Dicp16d<sup>34H11</sup>  
ICGVEDTHVFLSSEKNVRLPCNNALSGCTSTTWLYTRHSETVELVAGGKLNINERRERLSVGSDCSLNIMNATKEDYGSYICQQYVNEQQQGNVYLVYLVTLN

>Dicp16e<sup>34H11</sup>  
VPVEQKTLVFFSFGKECPALNNTLSDCSTTWINSRVSKTIELVGGKLNINRRERLSVGSDCSLNIMNATKEDYGSYICQQYVNRKQHGTDHVYLVYLVTLN

>Dicp16f<sup>34H11</sup>  
TSGVEETNVFFSFGENVRLPCNNALSDCTSTTWYNNRHSKTVELVGGKLNINRRERLSVGSDCSLNIMNATKEDYGSYICQQYVNRKQHGTDHVYLVYLVTLN
