# Supplementary material
Source: PubMed Central journal article supplement (PMC3351558)
Supplement: NIHMS360905-supplement-14.pdf [file NIHMS360905-supplement-14.pdf]

>Dicp3b<sup>262</sup>  
SSSSSSSSSSSSSSSDIGPGLSLTLSCRLFSYEVSCGDLFSSSEDLHLSWVNGAGVDLNTDSRYQISSTGCIIISLSTTLISEDEDKQWRCGVYQRNQLKTSDTFTVHYS

>Dicp3c<sup>262</sup>  
SPSSSSSSSSSSSSSDIGPGLSLTLSCRLFSYGLSCDGLFSSSEDLHLSWVNEAGVDLNTDSRYQISSTGCIIISLSTTLISEDEDKQWRCGVYQRNQLKTSDTFTVHYS

>Dicp3d<sup>262</sup>  
SPSSSSSSSSSSSSSDIGPGLSLTLSCRLFSYFGLSCDELFSSEDLHLSWVNEAGVDLNTDSRYQISSTGCIIISLSTTLISEDEDKQWRCGVYQRNQLKTSDTFTVHYS

>Dicp3e<sup>262</sup>  
SPSSSSSSSSSSSSSDIGPGLSLTLSCRLFSYGLSCDELFSSEDLHLSWVNEAGVDLNTDSRYQISSTGCIIISLSTTLISEDEDKQWRCGVYQRNQLKTSDTFTVHYS

>Dicp3f<sup>262</sup>  
SPSSSSSSSSSSSSSDIGPGLSLTLSCRLFSYEVSCDYLFSSSEDLHLSWVDEAGVDLNTDSRYQISSTGCIIISLSTTLISEDEDKQWRCGVYQRNQLKTSDTFTVHYS

>Dicp3k<sup>262</sup>  
SSSSSSSSSSSDIGPGLSLTLSCRLYS DAGLSCDDLFRSQHFRLSWVNEAGVDLNTDSRYQISSTGCIIISLSTTLISEDEDKQWRCGVYQRNQLKTSDTFTVHYS

>Dicp3l<sup>262</sup>  
SPSSSSSSSSSDIGPGLSLTLSCRLFIYSGFSCDGLFRLVDLHLSWVNEAGVDLNTDSRYQISSTGCIIISLSTTLISEDEDKQWRCGVYQRNQLKTSDTFTVHYS

>Dicp3m<sup>262</sup>  
SPSSSSSSSSSSSSSDIGPGLSLTLSCRLYS DSGFSCESLFSSEDLHLSWLDEAGVDLNTDSRYQISSTGCIIISLSTTLISEDEDKQWRCGVYQRNQLKTSDTFTVHYS

>Dicp3n<sup>262</sup>  
SPSSSSSSSSSDIGPGLSLTLSCRLFSYFARSCGDLFSSSEDLHLSWVDEAGVDLNTDSRYQISSTGCIIISLSTTLISEDEDKQWRCGVYQRNQLKTSDTFTVHYS

>Dicp3p<sup>262</sup>  
SPSSSSSSSDIRPGLSLTLSCRLFSYSGFSCDYLFRSQHLRLSWVNEAGVDLNTDSRYQISSTGCIIISLSTTLISEDEDKQWRCGVYQRNQLKTSDTFTVHYS

>Dicp3r<sup>262</sup>  
SPSSSSSSSSSDIGPGLSLTLSCRLYS DSGFSCDGLFRLLDLHLSWVNEAGVDLNTDSRYQISSTGCIIISLSTTLISEDEDKQWRCGVYQRNQLKTSDTFTVHYS

>Dicp3s<sup>262</sup>  
SPSSSSSSSSSDIGPGLSLTLSCRLVLYSGFSCDGLFSSSEDLHLSWVNEAGVDLNTDSRYQISSTGCIIISLSTTLISEDEDKQWRCGVYQRNQLKTSDTFTVHYS

>Dicp3t<sup>262</sup>  
SSSSSSSDIRPGPSLTLS CQLFSYSGFRCEYLVTKDLHLSWLDEAGVKLHRDSRYQISSTGCIIISLSTTLISEDEDKQWRCGVYQGNLMTSATVQHS

>Dicp14a<sup>1719</sup>  
SPSSSQTIKPGRSVTLFCQLYFCYEHS CETLLS SEGLQLIWNESGVNLQTSRDFQILSSVDHCS ISLTKTLLDEDDNTEWRCQITKGSEVKT SVSYTVSYL

>Dicp14b<sup>1719</sup>  
SPSSSQTIKPGRSVTLFCQLHFFYEHSCETLLTSEGLRLIWNESGVNLQTSRDFQISSSLNYCNISMTTKLLNEDDSTEWRCQITKGSEVKT SVSYTVSYL

>Dicp16a<sup>1952</sup>  
SSSLSQTEMRAGRSVTLKCKLEYGVSCDTLFRTEGYQLVWVNQAERNLATDSRYKIFSSSPCMISLTTLLNEDHNKEWRCQLTQNNQLKTSASFTVKYS

>Dicp16a<sup>34H11</sup>  
SSSLSQTEMRAGRSVTLKCKLEYSGVSCDTLFRTEGYLVWVNQAERNLVDNRYKIFSSSPCMISLTTLLNEDHNKEWRCQLTQNNQLKTSASFTVKYT

>Dicp16b<sup>1952</sup>  
SSSLSQTEIRAGRSVTLYCQLDLYASTCGDLVNYEGYQLMWVNQAGENLMTDSRYQISNVFSSRCMITLTTLLKEDHNREWRCQLTQRNQLKTSASFTVKYS

>Dicp16b<sup>34H11</sup>  
SSSLSQTEIRAGRSVTLYCQLDLYASTCGDLVNYEGYQLMWVNQAGKNLMTDSRYQISDVFSRCMITLTTLLKEDHNREWRCQLTQRNQLKTSASFTVKYS

>Dicp16c<sup>1952</sup>  
SSSLSQTGIRAGRSVTLYCQLDLYASTCGDLVNYEGYQLMWVNQAGENLMTDSRYQISDNFSSRCMITLTTLLKEDHNREWRCQLTQRNQLKTSASFTVKYS

>Dicp16c<sup>322B17</sup>  
SSSLSQAE MRAGRSVTLKCELEYSGVSCDSLFRTEGYQLVWVNQAERNLVDNRYKIFSSSPCMISLTTLLNEDHNREWRCQLTQNNQLKTSASFTVKYS

>Dicp16d<sup>34H11</sup>  
SLSSPQTEIRAGRSVTLSCQLYYYYGVSCDYLVLSIEGYQLMWVNQAGVNLTTDSRYQISDFTSSH CNISLTKLLNEDHNREWRCQLTQGNQLKTSASFTVNYYS

>Dicp16e<sup>34H11</sup>  
SPSLSQTEMRAGRSVTLSCQLHLYHGVS CDTLVRIEGYQLMWVNQAGGNLMTDSRYQILFFSNLCNISLTTLLNEDHNREWRCQLTQRNQPKTSASFTVKYS
