# Supplementary material
Source: PubMed Central journal article supplement (PMC3351558)

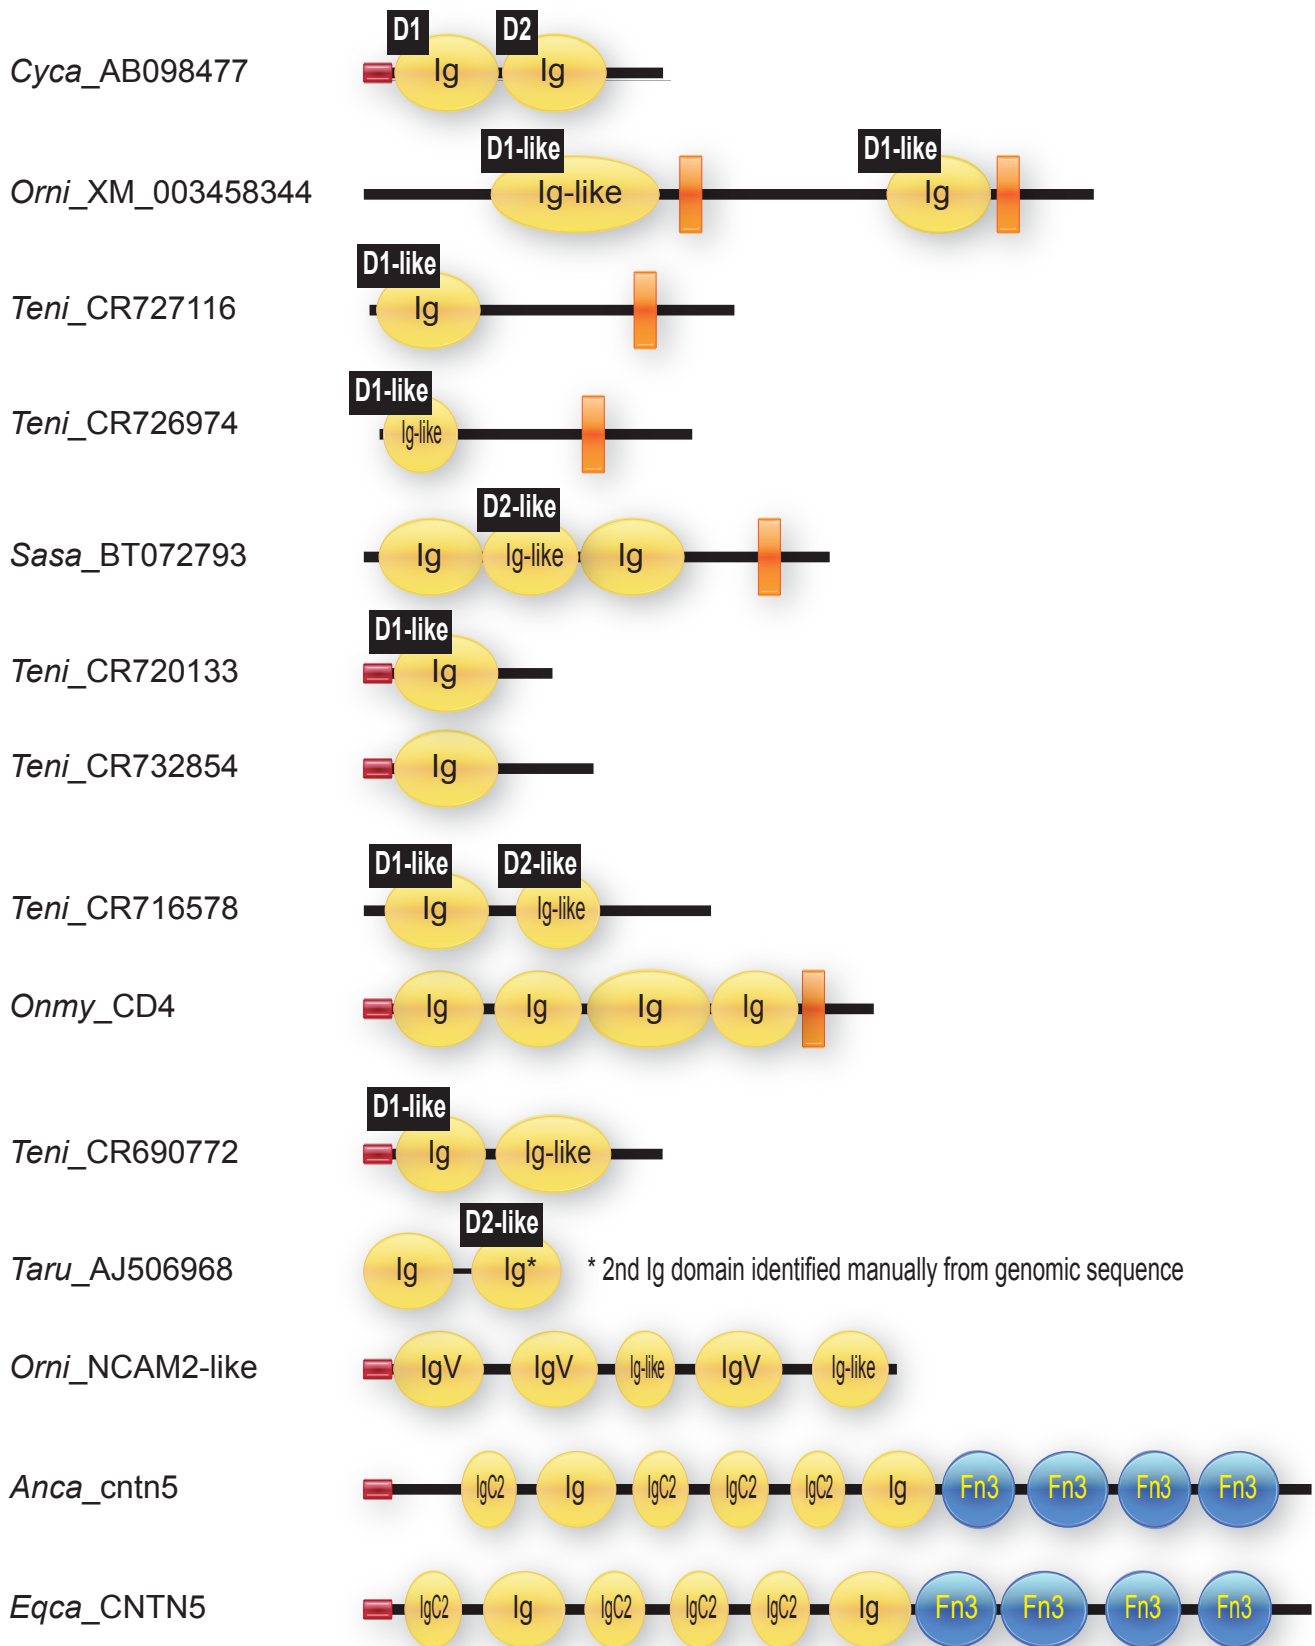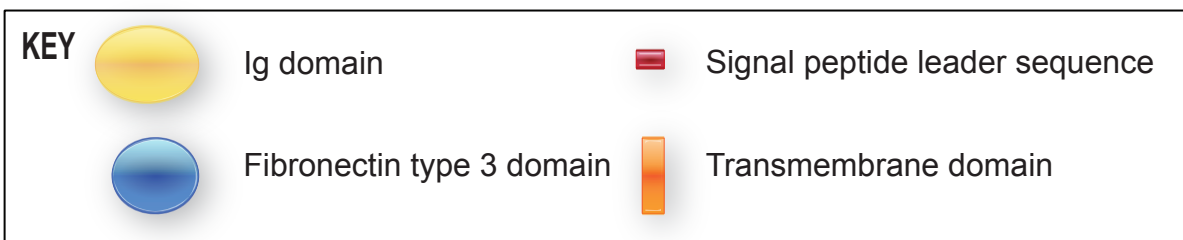

Supplement: NIHMS360905-supplement-09.pdf [file NIHMS360905-supplement-09.pdf]

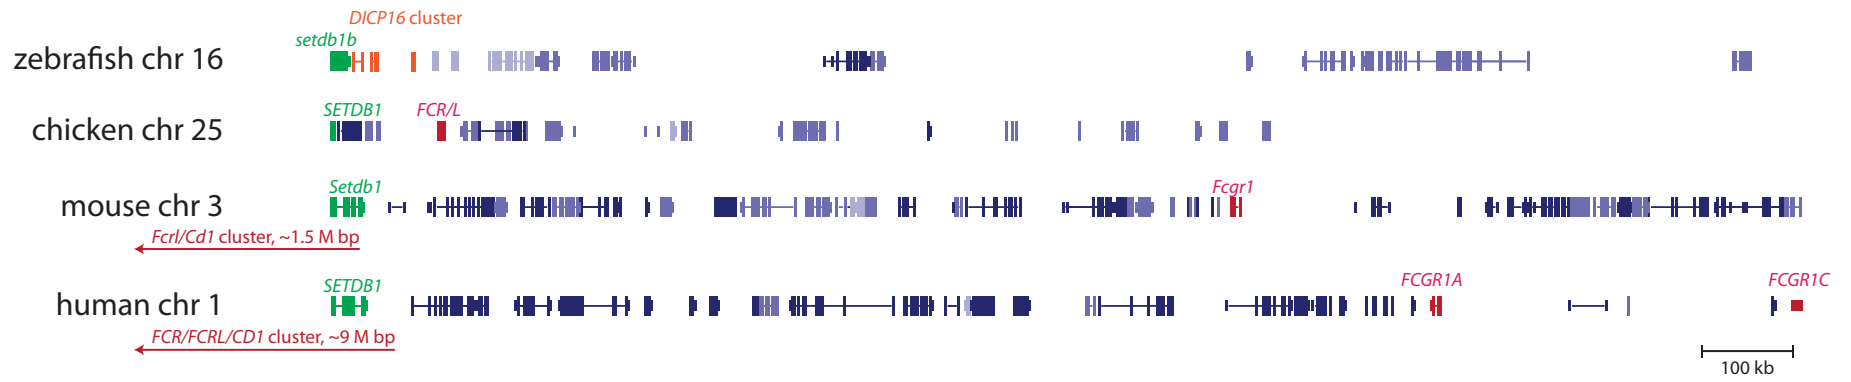

Supplement: NIHMS360905-supplement-11.pdf [file NIHMS360905-supplement-11.pdf]
